# Supplementary material
Source: Springer Nature journal article supplement (https://www.springermedizin.de/resource/supplementary/13046_2010_348_MOESM8_ESM.pdf/9661828)

# Meta-analysis random-effects estimates (linear form)

Study omitted

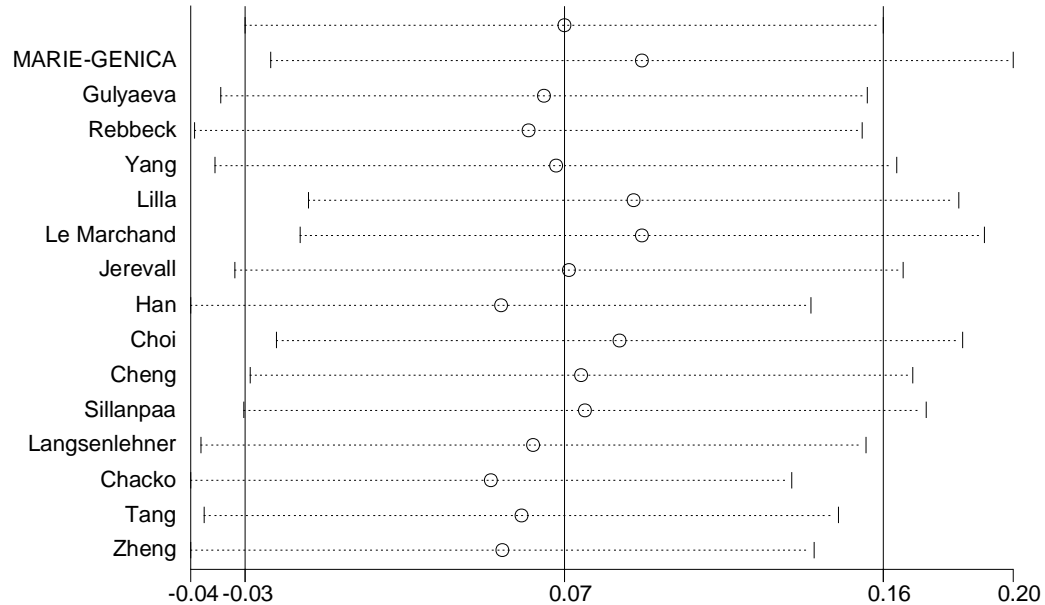

Supplement: MOESM8 [file 9661828]
